# Supplementary material for: Structural Transition in the Growth of Copper Terephthalate Metal–Organic Frameworks: Understanding the Effect of the Synthetic Protocol and Its Impact on Electrochemical Behavior
Source: MDPI journal article supplement (doi:10.3390/coatings13122065), 2023-12-10
Supplement: s1 [file s1]

## Supporting information

### **Structural transition in the growth of copper terephthalate metal–organic frameworks: understanding the effect of the synthetic protocol and its impact on electrochemical behavior**

Sara L. Rodríguez<sup>1</sup>, Gabriela A. Ortega-Moreno<sup>1</sup>, Manuel Sánchez-Sánchez<sup>2</sup>,

José L. Fernández<sup>3</sup>, Juan M. Zamaro<sup>1</sup>

<sup>1</sup> Instituto de Investigaciones en Catálisis y Petroquímica (INCAPE), Universidad Nacional del Litoral – CONICET, Santiago del Estero 2829 (3000), Santa Fe, Argentina.

<sup>2</sup> Instituto de Catálisis y Petroleoquímica (ICP) CSIC, C/Marie Curie, 2, 28049 Madrid, España.

<sup>3</sup> Instituto de Química Aplicada del Litoral (IQAL) and Programa de Electroquímica Aplicada e Ingeniería Electroquímica (PRELINE), Universidad Nacional del Litoral – CONICET, Santiago del Estero 2829 (3000), Santa Fe, Argentina.

\*Contact author information: E-mail: zamaro@fiq.unl.edu.ar; Full postal address: Santiago del Estero 2829 (3000) Santa Fe, Argentina; Phone number: +54-0342-4536861

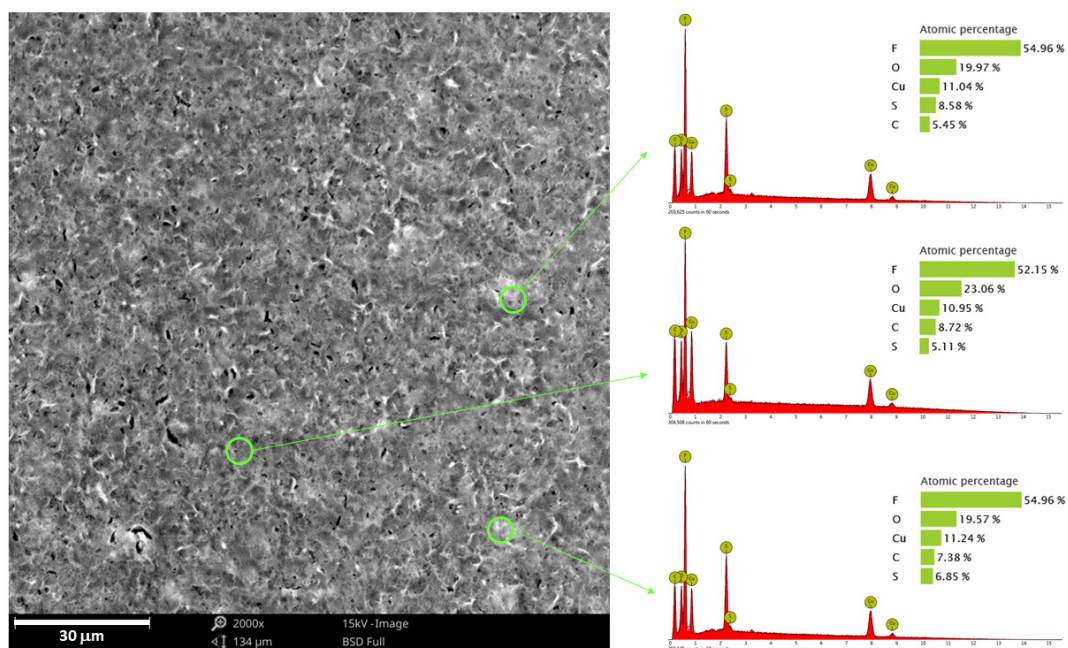

**Figure S1.** Large-scale SEM photograph of a GC-supported MWA-M/Nafion® film and EDS spectra recorded on different points of the film with the corresponding results of the semi-quantitative elemental analysis.

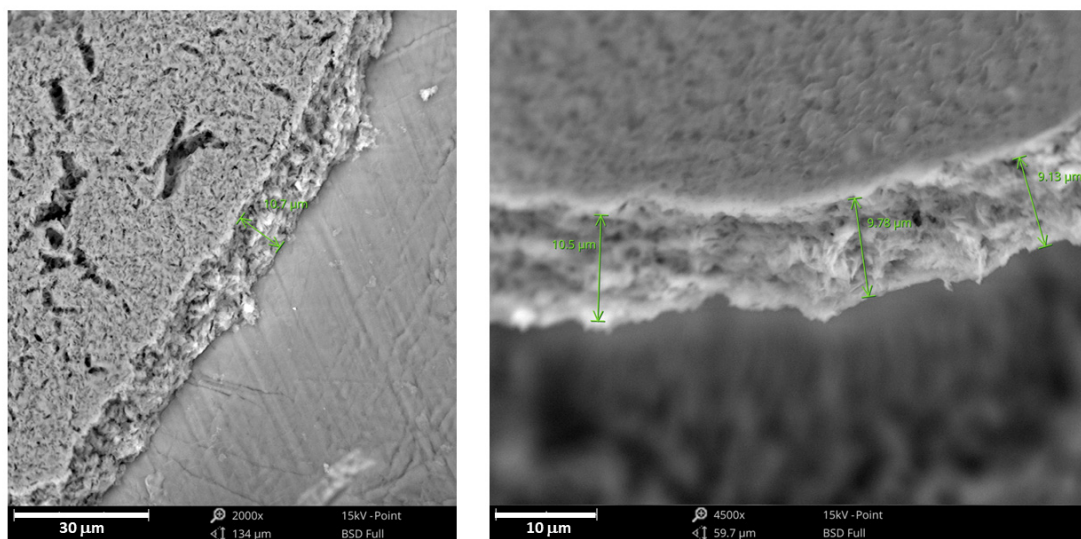

**Figure S2.** SEM photographs of MWA-M/Nafion® film thicknesses.

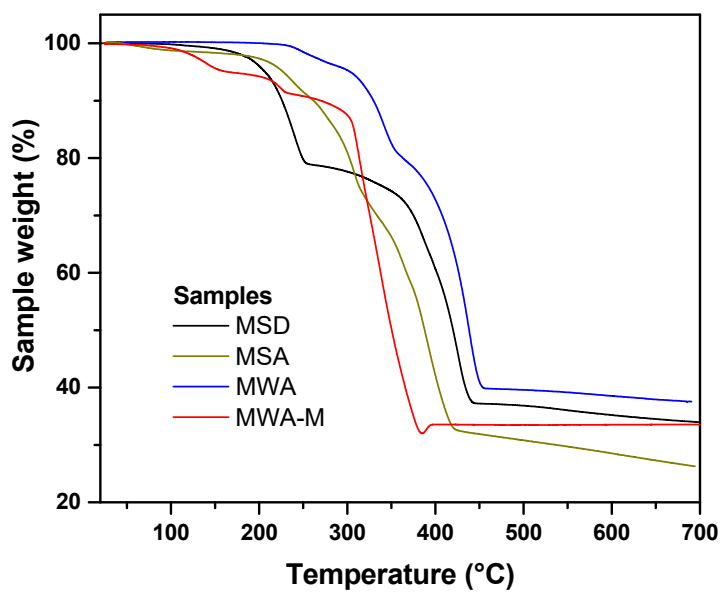

**Figure S3.** TGA curves of the synthesized Cu-BDCs: MSD, MSA, MWA and MWA-M.

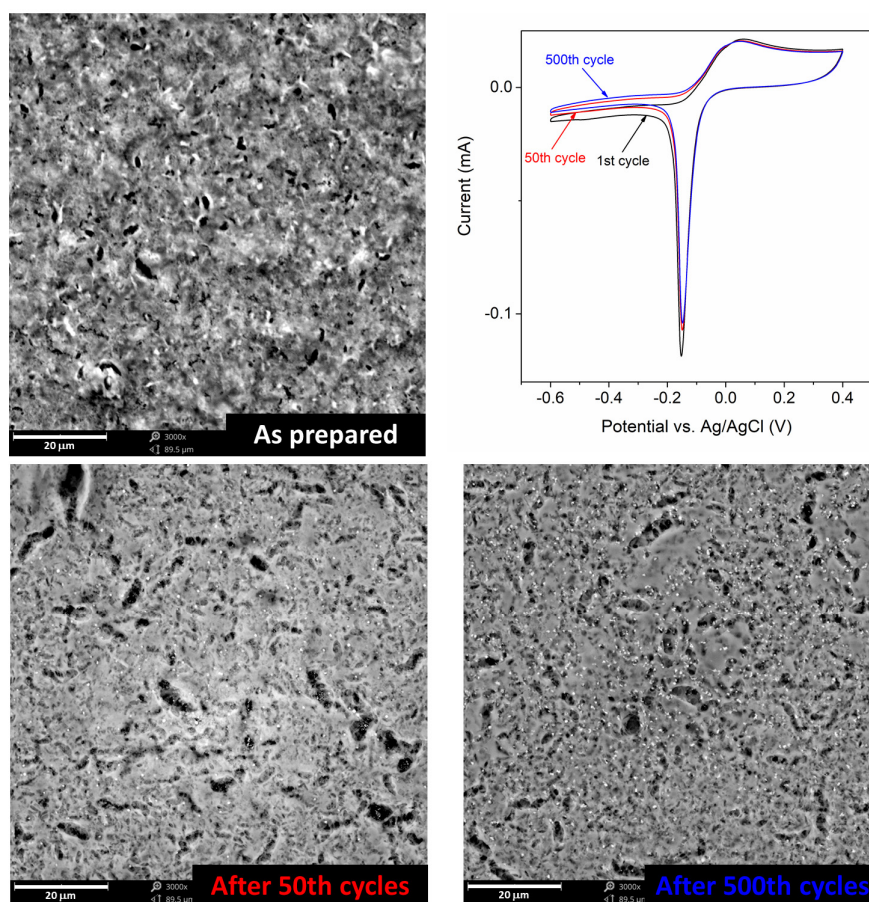

**Figure S4.** Obtained CVs and corresponding SEM photographs of a GC-supported MWA-M/Nafion<sup>®</sup> film before and after prolonged potential cycling, in 0.2 M phosphate buffer solution (pH = 7) saturated with N<sub>2</sub> (Scan rate: 0.1 V s<sup>-1</sup>).

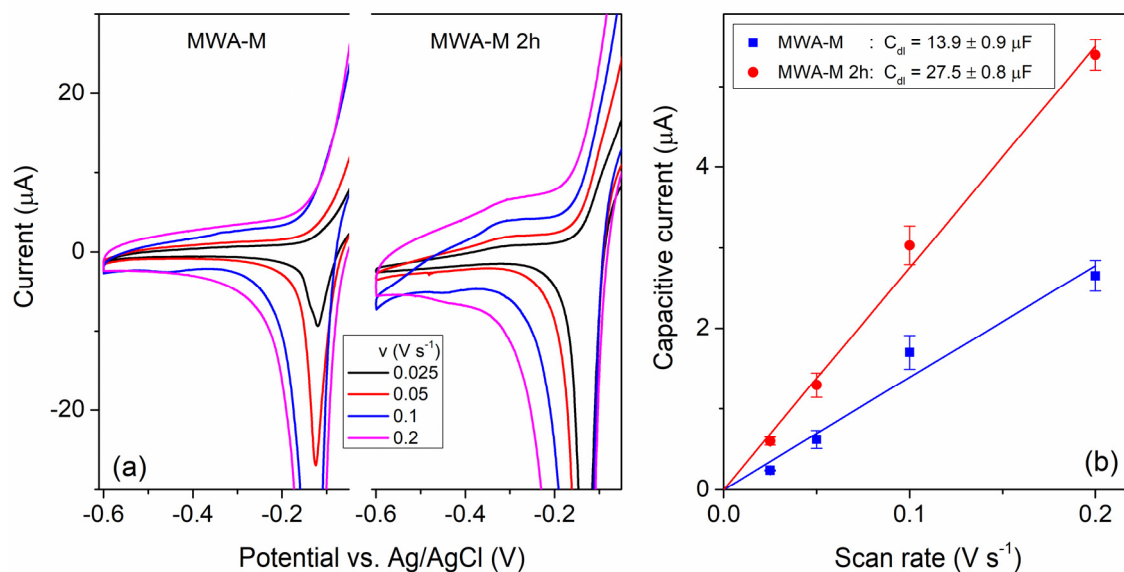

**Figure S5.** (a) CVs measured at different scan rates on MWA-M and on MWA-M sonicated for 2 h supported on GC RDEs in 0.2 M phosphate buffer solution (pH = 7) saturated with  $\text{N}_2$ . (b) Capacitive currents measured from the CVs at -0.35 V vs. Ag/AgCl as a function of the scan rate. Lines are linear fittings whose slopes are the double layer capacitances ( $C_{\text{dl}}$ ) indicated within the graph.

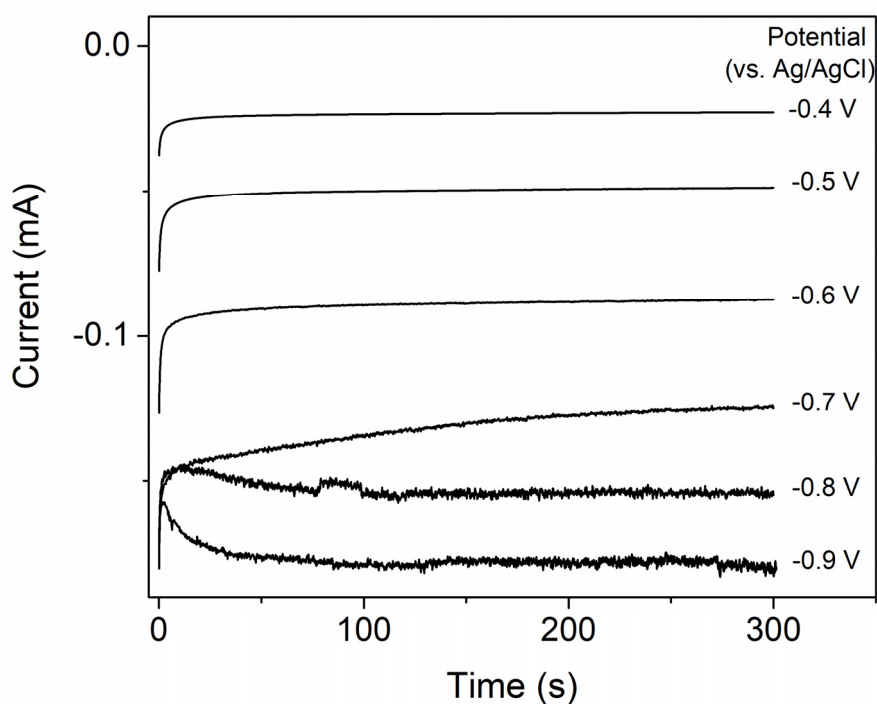

**Figure S6.** Amperometric current-time curves measured at different potentials on a GC-supported MWA-M/Nafion<sup>®</sup> film, in 0.2 M phosphate buffer solution (pH = 7) saturated with  $\text{O}_2$  (rotation rate: 1600 rpm).
